# Supplementary material for: Nickel cobalt oxide/carbon nanotubes hybrid as a high-performance electrocatalyst for metal/air battery
Source: Royal Society of Chemistry journal article supplement (doi:10.1039/c4nr02125h), 2014-01-01
Supplement: c4nr02125h1.pdf [file c4nr02125h1.pdf]

## Supporting Information

### Nickel Cobalt Oxide/carbon Nanotubes Hybrid as a High-performance Electrocatalyst for Metal/air Batteries

Hui Zhang<sup>a</sup>, Hang Qiao<sup>a</sup>, Haiyan Wang<sup>a\*</sup>, Nan Zhou<sup>b</sup>, Jiajie Chen<sup>a</sup>, Yougen Tang<sup>a\*</sup>, Jingsha Li<sup>a</sup>, Chenghuan Huang<sup>c</sup>

<sup>a</sup>College of Chemistry and Chemical Engineering, Central South University, Changsha, 410083, P.R. China. Tel.: +86-731-88830 886; Fax: +86-731-88879616. E-mail: wanghy419@126.com; ygtang@csu.edu.cn.

<sup>b</sup>College of Science, Hunan Agricultural University, Changsha, 410128, P.R.China.

<sup>c</sup>Hunan Changyuan Lico Co., Ltd., Changsha, 410205, P.R. China.

**Fig S1-S3**

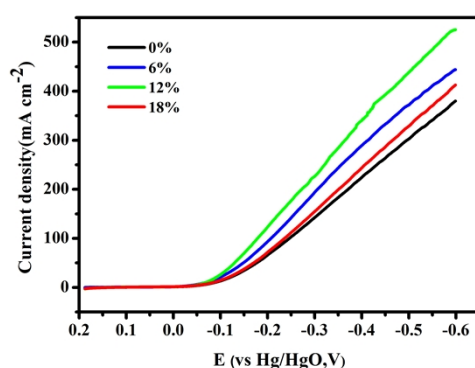

Fig. S1 The linear polarization curves of air electrodes with different contents of CNTs in 6 M KOH solution at 25 °C

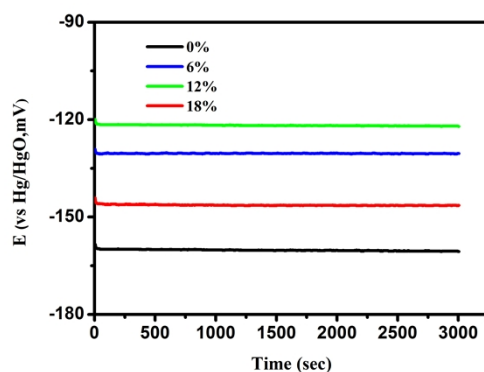

Fig. S2 Galvanostatic discharge curves of air electrodes with different contents of CNTs in 6 M KOH solution at a discharge current density of 50 mA cm<sup>-2</sup>

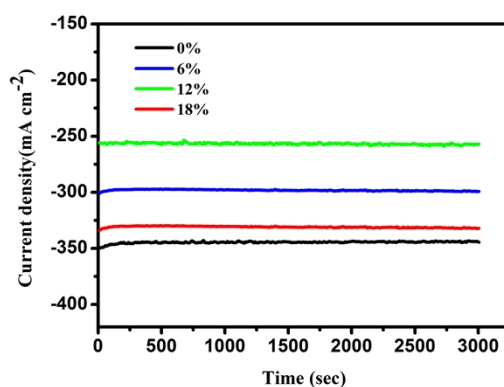

Fig. S3 Galvanostatic discharge curves of air electrodes with different contents of CNTs in 6 M KOH solution at a discharge current density of  $200 \text{ mA cm}^{-2}$

For determining the best proportion of  $\text{NiCo}_2\text{O}_4$  and CNTs in the nickel cobalt oxide/carbon nanotubes hybrid, we carried out the controlled experiments to optimize the catalytic activity of the composite electrodes by systematically changing the contents of CNTs. In the controlled experiments, the contents of CNTs are theoretically designed to 0%, 6%, 12% and 18%, respectively. The electrochemical properties of hybrids with different contents of CNTs were well conducted by using the three-electrode half-cell. The catalytic performance on ORR activities was investigated by the steady-state linear polarization curves and the galvanostatic discharge curves measurements. The results revealed that the hybrid with ca. 12 wt % CNTs displayed the best ORR performance.
